# Why are poorer children at higher risk of obesity and overweight? A UK cohort study

Alice Goisis<sup>1,2</sup>, Amanda Sacker<sup>1</sup>, Yvonne Kelly<sup>1</sup>

<sup>1</sup> Department of Epidemiology & Public Health, University College London, 1-19 Torrington Place, London, WC1E 6BT, UK

<sup>2</sup> Department of Social Policy, London School of Economics, Houghton Street, London, WC2A 2AE, UK

**Correspondence:** Yvonne Kelly, Department of Epidemiology & Public Health, University College London, 1-19 Torrington Place, London, WC1E 6BT, UK; Tel: 020 7679 1632, Fax: 020 7813 0280, e-mail: [y.kelly@ucl.ac.uk](mailto:y.kelly@ucl.ac.uk)

**Background:** There is limited evidence on which risk factors attenuate income inequalities in child overweight and obesity; whether and why these inequalities widen as children age. **Method:** Eleven thousand nine hundred and sixty five singletons had complete data at age 5 and 9384 at age 11 from the Millennium Cohort Study (UK). Overweight (age 5 : 15%; age 11 : 20%) and obesity (age 5 : 5%; age 11 : 6%) were defined using the International Obesity Taskforce body mass index cut-points. To measure socioeconomic inequalities, we used quintiles of family income and as risk factors, we considered markers of maternal health behaviours and of children's physical activity, sedentary behaviours and diet. Binary and multinomial logistic regression models were used. **Results:** The unadjusted analyses revealed stark income inequalities in the risk of obesity at age 5 and 11. At age 5, children in the bottom income quintile had 2.0 (95% CI: 1.4–2.8) increased relative risk of being obese whilst at age 11 they had 3.0 (95% CI: 2.0–4.5) increased risk compared to children in the top income quintile. Similar income inequalities in the risk of overweight emerged by age 11. Physical activity and diet were particularly important in explaining inequalities. Income inequalities in obesity and overweight widened significantly between age 5 and 11 and a similar set of risk factors protected against upward and promoted downward movements across weight categories. **Conclusions:** To reduce income inequalities in overweight and obesity and their widening across childhood the results support the need of early interventions which take account of multiple risk factors.

## Introduction

In recent decades, the prevalence of obesity among children and adults has increased dramatically in the UK and elsewhere.<sup>1–3</sup> Obesity is linked to the development of numerous chronic diseases and poses significant health and economic burdens.<sup>4,5</sup> In the context of lifelong health, we know that children who become overweight and obese are at higher risk of obesity throughout their lives.<sup>6,7</sup> There is also evidence that overweight and obese children face higher risks of negative economic and social outcomes both in childhood and adulthood.<sup>4,8</sup> Therefore, intervening early to reduce the prevalence of obesity and overweight could have long-term knock on effects for population health.

Numerous studies show that in many developed countries, including the UK, there are income and other socioeconomic inequalities in the risk of childhood obesity and overweight, and that these begin in the preschool years.<sup>9–13</sup> A few studies also reveal that socioeconomic inequalities in overweight/obesity widen across childhood.<sup>14,15</sup> These inequalities are likely explained by differential access to resources and/or knowledge by poorer parents who may practice worse health behaviours,<sup>16–18</sup> but until now there has been no attempt to examine and compare several potential mechanisms linking family socioeconomic position to overweight/obesity in children. Our understanding of why children from socially disadvantaged backgrounds experience higher risk of obesity and overweight—and increasingly so across childhood—is limited.<sup>10,11,19</sup>

Our study, which focuses on the UK context, addresses this gap in knowledge in several ways. First, we examine which markers of family health behaviours and environmental risk factors reduce income inequalities in child overweight and obesity in the UK. To investigate whether influences are similar across childhood, we considered two age points: in early childhood at 5 years and on the cusp of adolescence at 11 years. Second, we investigate whether income inequalities widen across childhood by assessing whether poorer children were

more likely to experience upward movements and less likely to experience downward movements across weight categories (normal weight, overweight, obese) between age 5 and 11. Third, we investigate which risk factors protect against upward movements and which promote downward movements across weight categories. To conduct the analyses, we used data from the large population-based UK Millennium Cohort Study.

## Methods

### The Millennium Cohort Study

The Millennium Cohort Study (MCS) is a UK nationally representative prospective cohort study of children born into 19 244 families.<sup>20</sup> The sample population was drawn from all live births in the UK from September 2000 to January 2002. The sample was selected from a random sample of electoral wards with a stratified sampling strategy to ensure adequate representation of all four UK countries, and of disadvantaged and ethnically diverse areas. The first sweep of data was collected when cohort members were around 9 months and the subsequent four sweeps of data were collected at ages 3, 5, 7 and 11 years. During home visits interviews were conducted and questions asked about socioeconomic circumstances, health-related behaviours including smoking during pregnancy, infant feeding, physical and sedentary activities and dietary markers. Interview data were available for 79 and 69% of families when cohort members were aged 5 and 11, respectively.

### Child overweight and obesity

Overweight and obesity were defined using the International Obesity Taskforce (IOTF) body mass index ( $\text{kg m}^{-2}$ ) cut-points<sup>21</sup> which are age and gender specific. At ages 5 and 11, children were weighed without shoes or outdoor clothing using Tanita HD-305 scales (Tanita UK Ltd., Middlesex, UK) and weights were recorded in

kilograms to one decimal place. Heights were obtained using the Leicester Height Measure Stadiometer (Seca Ltd., Birmingham, UK) and recorded to the nearest millimetre.<sup>22</sup>

### *Family income*

To measure socioeconomic inequalities, we used quintiles of family income after adjustment using the modified OECD scale, which were derived by the MCS survey team.<sup>20</sup> This scale takes into account the number of people in the household by setting the family's needs relative to those of a couple with no children.<sup>20,23</sup> Family income was used in the analyses as a marker of access to resources (to purchase 'healthy' food, organized physical activities and to live in safer neighbourhoods etc.), and we expected children from poorer families to be at increased risk of overweight or obesity.<sup>24</sup> In the analyses, the top income quintile was the reference category.

### *Potentially modifiable risk factors*

We selected markers of health behaviours and environmental influences hypothesized to attenuate income inequalities in child overweight and obesity. To capture the mother's health-related behaviours during pregnancy and after birth, we considered whether the mother smoked during pregnancy,<sup>25</sup> duration of breastfeeding (no breastfeeding, up to 2 months, 2–4 months, more than 4 months)<sup>26,27</sup> and whether the child was introduced to solid foods before 4 months of age.<sup>24,28</sup> Markers of children's physical activity and sedentary behaviours were frequency of sport/exercise (less than once, once or twice, three times or more per week),<sup>29</sup> active playing with a parent (less than once, once or twice, three times or more per week), hours watching TV (less than one, between one and three, three or more per day),<sup>18</sup> hours playing on a PC (less than one, between one and three, three or more per day),<sup>30</sup> at least weekly use of a playground (at age 5), whether there was a playground in the area (age 11), journeys in the area by bike (measure available at age 11 only) and weekday bedtime (at age 5: before 7:30, 7:30–7:59, 8–8:59, 9 or later, no regular bedtime; at age 11: before 8, 8–8:59, 9–9:59, 10 or later, no regular bedtime).<sup>18</sup> A marker of active transport—whether children actively commuted to school—was excluded as this was not significantly associated with adiposity. Markers of the dietary environment in which children were growing up were whether the child skipped breakfast,<sup>31</sup> fruit consumption (none or one, two, three or more per day),<sup>9</sup> sweet drinks consumption (at age 5: as main drink in between meals; at age 11: at least once a day)<sup>32</sup> and maternal BMI (obtained using mothers' self-reported weight and height).<sup>33</sup> Data on early life markers of maternal health behaviours were collected when cohort members were aged around 9 months (Sweep 1) and the other risk factors were, unless indicated otherwise, measured contemporaneously i.e. at ages 5 or 11 years. Children's health behaviours, at both ages, were reported by the mother at interview.

### *Inclusion criteria, exclusions and losses to follow up*

We dropped observations with missing values on adiposity and risk factors (at age 5 = 3104; at age 11 = 3703). From the complete case sample, we dropped children who had implausible ( $z$ -score was  $\leq -5$  or  $\geq 5$ ) BMI values (at age 5  $n = 14$ ; at age 11  $n = 2$ ). If the mother was pregnant when the cohort member was aged 5 or 11 we used mother's BMI recorded at the previous Sweep of data collection (at age 5  $n = 556$ ; at age 11  $n = 121$ ). Lastly, we also dropped twins and triplets (age 5  $n = 162$ ; age 11  $n = 120$ ) and cohort members for whom the mother was not the main interviewee at Sweep 1 (age 5  $n = 1$ ; age 11  $n = 3$ ). These exclusions reduced the analytical sample to 11 965 (78%) at 5 years, and 9384 (71%) at 11 years.

### *Statistical analyses*

We used multinomial logistic regression to estimate income gradients in child overweight and obesity whereby non-overweight

children were the reference group. Models were run jointly for boys and girls and adjusted for gender of the child. The analyses were not stratified by gender since exploratory analyses (not shown) did not reveal differences for boys and girls in the role that risk factors had in attenuating income inequalities in children's adiposity. In models estimated at age 11, we included a control variable for whether girls and boys exhibited any sign of pubertal changes (menarche, hair on body or breast growth for girls; voice change, hair on body or facial hair for boys).<sup>34,35</sup> The baseline model shows the unadjusted association between income and overweight/obesity. Then we revealed the role that each category of risk factors had in attenuating income gradients in child overweight and obesity by adjusting for each category of risk factors separately: model 1 adjusts for maternal health behaviours; model 2 for markers of physical activity and sedentary behaviours and model 3 for dietary markers. In order to assess to what extent income inequalities were attenuated when all the risk factors were considered, Model 4 adjusts for all categories of risk factors simultaneously.

We assessed whether income inequalities widened significantly across ages by investigating whether poorer children were more likely to experience upward movements and less likely to experience downward movements across weight categories between age 5 and 11. To do so, we created two binary variables. One variable indicating whether the child transitioned from being normal weight at age 5 to being overweight/obese at age 11 or from being overweight to obese; the other binary variable indicating whether a child transitioned from being obese at age 5 to being overweight/normal weight at age 11 or transitioned from being overweight to normal weight. Using these binary indicators as dependent variables in a logistic regression model, we estimated income gradients in/upwards/downward movements with adjustment for the gender of the child and the child's weight category at age 5 (normal weight, overweight, obese). Then, to investigate which category of risk factors measured at age 5 promoted or protected against these changes across income groups, we adjusted for each set of risk factors separately and, lastly, we estimated a model adjusting for all risk factors simultaneously. We focused on risk factors measured at age 5 in order to establish a temporal order between exposure to family health behaviours, routines and environmental risk factors, and children's experiences of (upward or downward) weight changes. Adding to the models age 11 risk factors did not change our findings (results not reported). The logistic regression models were estimated on a sub-sample given that only children who were at risk of experiencing upward (normal weight or overweight children at age 5) or downward (obese or overweight children at age 5) movements were included in these analyses.

All analyses were conducted in Stata version 13. We used weights to account for non-response and overrepresentation of disadvantaged and ethnically diverse areas and the survey command to account for the clustering of samples within strata in the MCS. The model results are reported as relative risk ratios or odds ratios with 95% confidence intervals.

## **Results**

Table 1 shows that the prevalence of obesity was considerably higher among children in the poorest quintile compared with their peers in the top income quintile (6.6 vs. 3.5% at age 5; 7.9 vs. 2.9% at age 11). At age 5, there was no evidence of an income gradient in child overweight, but by age 11 differences between children from poorer compared with richer families had emerged (20.2 vs. 16.5%). Testing for linear trend shows that differences by income quintiles were statistically significant for obesity at age 5, and both overweight and obesity at age 11.

Table 1 also shows that there were striking income gradients in the distribution of risk factors. Children in the lower income quintiles

**Table 1** Average % of overweight/obesity and description of risk factors by income quintiles at age 5 ( $n = 11965$ ) and 11 ( $n = 9384$ )

|                                                                       | Age 5            |        |       |       |      |                                         |         | Age 11           |        |       |       |      |                                         |         |
|-----------------------------------------------------------------------|------------------|--------|-------|-------|------|-----------------------------------------|---------|------------------|--------|-------|-------|------|-----------------------------------------|---------|
|                                                                       | Income quintiles |        |       |       |      |                                         |         | Income quintiles |        |       |       |      |                                         |         |
|                                                                       | Bottom           | Second | Third | Forth | Top  | P values<br>test for<br>linear<br>trend | Average | Bottom           | Second | Third | Forth | Top  | P values<br>test for<br>linear<br>trend | Average |
| Child overweight                                                      | 14.9             | 14.1   | 14.5  | 17.0  | 14.3 | 0.50                                    | 15.0    | 20.2             | 21.8   | 23.0  | 19.5  | 16.5 | 0.00                                    | 20.1    |
| Child obesity                                                         | 6.6              | 5.7    | 5.5   | 4.7   | 3.5  | 0.00                                    | 5.1     | 7.9              | 8.8    | 6.2   | 3.8   | 2.9  | 0.00                                    | 5.8     |
| Mother's health behaviours                                            |                  |        |       |       |      |                                         |         |                  |        |       |       |      |                                         |         |
| Smoked during pregnancy                                               | 44.2             | 31.9   | 23.5  | 13.6  | 7.3  |                                         | 23.1    | 49.3             | 38.2   | 24.2  | 12.3  | 5.9  |                                         | 24.8    |
| Introduction to solid foods before 4 months                           | 34.6             | 36.2   | 33.9  | 29.4  | 23.3 |                                         | 31.2    | 35.3             | 35.6   | 33.6  | 29.6  | 23.6 |                                         | 31.4    |
| No breastfeeding                                                      | 45.9             | 37.7   | 28.4  | 23.6  | 13.6 |                                         | 29.0    | 57.8             | 43.3   | 34.6  | 19.8  | 12.2 |                                         | 32.3    |
| Breastfeeding up to 2 months                                          | 27.8             | 30.3   | 31.3  | 29.4  | 26.5 |                                         | 29.0    | 25.3             | 31.5   | 29.0  | 29.1  | 25.7 |                                         | 28.2    |
| Breastfeeding up to 4 months                                          | 9.4              | 11.0   | 13.0  | 14.3  | 18.3 |                                         | 13.4    | 6.4              | 9.2    | 11.0  | 15.0  | 18.6 |                                         | 12.4    |
| Breastfeeding over 4 months                                           | 17.0             | 21.0   | 27.4  | 32.7  | 41.5 |                                         | 28.5    | 10.5             | 16.0   | 25.4  | 36.1  | 43.4 |                                         | 27.2    |
| Child physical activity and sedentary behaviours                      |                  |        |       |       |      |                                         |         |                  |        |       |       |      |                                         |         |
| Sport/exercise < 1 a week                                             | 69.3             | 59.1   | 43.9  | 32.6  | 21.8 |                                         | 44.1    | 39.5             | 34.0   | 23.5  | 17.0  | 13.5 |                                         | 24.8    |
| Sport/exercise 1/2 a week                                             | 27.1             | 35.0   | 47.3  | 54.6  | 59.8 |                                         | 45.7    | 39.9             | 43.3   | 44.3  | 42.5  | 39.9 |                                         | 42.0    |
| Sport/exercise 3+ a week                                              | 3.7              | 5.8    | 8.7   | 12.8  | 18.4 |                                         | 10.2    | 20.7             | 22.7   | 32.2  | 40.6  | 46.6 |                                         | 33.2    |
| Active playing with a parent <1 a week                                | 32.5             | 25.9   | 17.2  | 14.7  | 10.6 |                                         | 19.6    | 56.6             | 52.9   | 47.4  | 40.7  | 36.5 |                                         | 46.3    |
| Active playing with a parent 1/2 a week                               | 33.7             | 34.5   | 40.3  | 38.3  | 40.6 |                                         | 37.7    | 27.2             | 30.1   | 33.2  | 39.1  | 40.7 |                                         | 34.4    |
| Active playing with a parent 3+ a week                                | 33.8             | 39.5   | 42.5  | 47.0  | 48.8 |                                         | 42.7    | 16.2             | 17.0   | 19.3  | 20.2  | 22.8 |                                         | 19.3    |
| TV less than 1 h on weekday                                           | 16.6             | 18.3   | 18.7  | 21.2  | 31.3 |                                         | 21.5    | 13.9             | 12.5   | 15.0  | 17.3  | 21.5 |                                         | 16.2    |
| TV 1 h to under 3 h on weekday                                        | 61.4             | 64.2   | 67.8  | 66.7  | 60.6 |                                         | 64.2    | 65.4             | 69.9   | 70.0  | 69.2  | 66.6 |                                         | 68.3    |
| TV 3 h or more on weekday                                             | 22.1             | 17.6   | 13.5  | 12.1  | 8.1  |                                         | 14.3    | 20.7             | 17.6   | 15.1  | 13.5  | 11.9 |                                         | 15.5    |
| PC less than 1 h on weekday                                           | 69.0             | 73.7   | 78.0  | 80.4  | 86.5 |                                         | 77.9    | 47.7             | 49.3   | 53.9  | 55.2  | 60.3 |                                         | 53.6    |
| PC 1 h to under 3 h on weekday                                        | 25.8             | 22.7   | 19.6  | 17.6  | 12.3 |                                         | 19.3    | 43.4             | 42.1   | 40.4  | 39.7  | 34.7 |                                         | 39.9    |
| PC 3 h or more on weekday                                             | 5.2              | 3.6    | 2.4   | 2.0   | 1.2  |                                         | 2.8     | 8.9              | 8.6    | 5.6   | 5.1   | 5.1  |                                         | 6.5     |
| Bedtime Age 5: before 7/Age 11: before 8                              | 22.2             | 21.4   | 21.3  | 21.6  | 20.1 |                                         | 21.3    | 4.0              | 2.6    | 2.2   | 2.2   | 1.3  |                                         | 2.4     |
| Bedtime Age 5: 7–7:59/Age 11: 8–8:59                                  | 23.5             | 29.6   | 35.4  | 38.6  | 42.5 |                                         | 34.4    | 28.3             | 27.6   | 33.2  | 36.8  | 40.5 |                                         | 33.6    |
| Bedtime Age 5: 8–8:59/Age 11: 9–9:59                                  | 28.7             | 32.1   | 30.2  | 29.5  | 30.8 |                                         | 30.3    | 45.4             | 50.4   | 50.1  | 49.6  | 47.5 |                                         | 48.7    |
| Bedtime 9 or later/Age 11: 10 or later                                | 9.6              | 5.7    | 3.7   | 3.5   | 2.3  |                                         | 4.8     | 7.7              | 6.8    | 6.2   | 4.1   | 3.5  |                                         | 5.6     |
| Bedtime not regular                                                   | 16.0             | 11.2   | 9.4   | 6.7   | 4.4  |                                         | 9.3     | 14.7             | 12.7   | 8.2   | 7.3   | 7.1  |                                         | 9.8     |
| Playground Age 5: child taken weekly/Age 11: availability in the area | 66.3             | 60.5   | 61.1  | 58.5  | 60.1 |                                         | 61.2    | 90.7             | 91.7   | 93.2  | 94.8  | 96.0 |                                         | 93.4    |
| Use of bike in the area (Age 11 only)                                 | N/A              |        |       |       |      |                                         |         | 63.5             | 65.0   | 68.7  | 68.9  | 70.6 |                                         | 67.5    |
| Child's diet                                                          |                  |        |       |       |      |                                         |         |                  |        |       |       |      |                                         |         |
| Portions of fruit per day: 1 or none                                  | 29.0             | 23.5   | 19.0  | 14.9  | 10.7 |                                         | 19.0    | 41.4             | 36.4   | 32.1  | 26.1  | 18.9 |                                         | 30.4    |
| Portions of fruit per day: 2                                          | 31.1             | 29.2   | 27.5  | 26.6  | 21.4 |                                         | 26.9    | 24.9             | 26.9   | 26.1  | 25.9  | 23.5 |                                         | 25.5    |
| Portions of fruit per day: 3+                                         | 39.9             | 47.3   | 53.5  | 58.5  | 67.9 |                                         | 54.1    | 33.8             | 36.6   | 41.8  | 47.9  | 57.6 |                                         | 44.1    |
| Skipping breakfast                                                    | 11.4             | 8.4    | 5.9   | 4.5   | 3.5  |                                         | 6.5     | 22.4             | 18.8   | 11.9  | 9.8   | 6.4  |                                         | 13.4    |
| Sweet drinks consumption                                              | 24.0             | 22.3   | 21.4  | 17.5  | 13.0 |                                         | 19.4    | 42.0             | 34.3   | 30.8  | 26.2  | 22.9 |                                         | 30.8    |
| Mother BMI (mean)                                                     | 25.3             | 25.8   | 25.3  | 24.9  | 24.3 |                                         | 25.1    | 26.8             | 26.2   | 26.2  | 25.3  | 24.8 |                                         | 25.8    |
| Female child                                                          | 50.1             | 49.0   | 49.3  | 47.8  | 50.0 |                                         | 49.2    | 48.4             | 47.6   | 48.3  | 47.9  | 49.6 |                                         | 48.4    |
| Family income quintiles                                               | 17.7             | 18.9   | 20.5  | 21.1  | 21.8 |                                         | 20.0    | 17.1             | 19.9   | 20.2  | 20.9  | 21.8 |                                         | 20.0    |
| Puberty                                                               | N/A              |        |       |       |      |                                         |         | 34.2             | 38.4   | 37.2  | 31.5  | 31.8 |                                         | 34.5    |

Figures are percentages unless otherwise specified

Note: all estimates are weighted and adjusted for design effects.

were more likely to have mothers who smoked during pregnancy, were not breastfed or breastfed for a shorter duration, were introduced to solid food earlier; they were less likely to do sports, to engage in active playing with a parent, to be living in an area with a playground and to use a bike in the area, spent more time watching TV and using a PC, and they tended to have later or irregular bedtimes; they were also less likely to be eating fruit, to have breakfast every day and their mothers had higher average BMIs. In contrast, at age 5 children in the lower income quintiles were more likely to be taken to the playground at least weekly.

### Which risk factors might explain income inequalities?

Table 2 shows selected results from the multinomial logistic regression models at age 5 ( $n = 11\ 965$ ): the reported risk of being overweight and obese relative to the risk of being non-overweight (results for the risk factors are available upon request). In the baseline model, poorer

children experienced significantly higher relative risk of being obese than children in the top income quintile (2.0 95% CI: 1.4–2.8). Physical activity and dietary risk factors appeared most important in attenuating inequalities. After adjustment for all risk factors in the final model, income inequalities were substantially reduced. On adjustment for all risk factors in Model 4, children in the bottom income quintile had a reduction in the relative risk of obesity of around 60%. There was no evidence of an income gradient in the relative risk of being overweight at age 5.

Table 3 shows selected results of the multinomial regression models at age 11 ( $n = 9384$ ). In the unadjusted models, inequalities appeared more pronounced compared to age 5. Children in the bottom income quintile had 3.0 (95% CI: 2.0–4.5) increased relative risk of being obese at age 11. At age 11, children in the second income quintile had the highest relative risk of being obese (3.4 95% CI: 2.2–5.1), but, as revealed by the overlap in the confidence intervals, differences between the bottom and second

**Table 2** Relative risk ratios (95% confidence interval) of overweight and obesity at age 5 by income quintiles with additional adjustments for risk factors at age 5 (*n* = 11 965)

| Multinomial logistic model results |                             |                                                                   |                                                                  |                                                        |                                                         |
|------------------------------------|-----------------------------|-------------------------------------------------------------------|------------------------------------------------------------------|--------------------------------------------------------|---------------------------------------------------------|
|                                    | Baseline model <sup>a</sup> | Model 1: Baseline model + mother's health behaviours <sup>b</sup> | Model 2: baseline model + physical activity markers <sup>c</sup> | Model 3: baseline model + dietary markers <sup>d</sup> | Model 4: baseline model + all risk factors <sup>e</sup> |
| Overweight age 5                   |                             |                                                                   |                                                                  |                                                        |                                                         |
| Top                                | Reference                   | Reference                                                         | Reference                                                        | Reference                                              | Reference                                               |
| Fourth                             | 1.3(1.0–1.5)                | 1.2(1.0–1.4)                                                      | 1.2(1.0–1.5)                                                     | 1.2(1.0–1.5)                                           | 1.2(1.0–1.4)                                            |
| Third                              | 1.0(0.9–1.3)                | 0.9(0.8–1.1)                                                      | 1.0(0.8–1.2)                                                     | 1.0(0.8–1.2)                                           | 0.9(0.7–1.1)                                            |
| Second                             | 1.0(0.8–1.2)                | 0.9(0.7–1.1)                                                      | 1.0(0.8–1.2)                                                     | 0.9(0.8–1.1)                                           | 0.8(0.7–1.0)                                            |
| Bottom                             | 1.1(0.9–1.3)                | 0.9(0.8–1.1)                                                      | 1.0(0.9–1.3)                                                     | 1.0(0.9–1.2)                                           | 0.9(0.7–1.1)                                            |
| Obesity age 5                      |                             |                                                                   |                                                                  |                                                        |                                                         |
| Top                                | Reference                   | Reference                                                         | Reference                                                        | Reference                                              | Reference                                               |
| Fourth                             | 1.4(1.0–2.1)                | 1.4(0.9–2.0)                                                      | 1.4(0.9–2.0)                                                     | 1.3(0.9–1.9)                                           | 1.3(0.9–1.9)                                            |
| Third                              | 1.6(1.1–2.3)                | 1.5(1.0–2.2)                                                      | 1.5(1.0–2.1)                                                     | 1.4(1.0–2.0)                                           | 1.3(0.8–1.9)                                            |
| Second                             | 1.7(1.2–2.4)                | 1.5(1.0–2.2)                                                      | 1.4(1.0–2.1)                                                     | 1.3(0.9–1.9)                                           | 1.1(0.8–1.7)                                            |
| Bottom                             | 2.0(1.4–2.8)                | 1.7(1.2–2.5)                                                      | 1.6(1.1–2.3)                                                     | 1.6(1.1–2.3)                                           | 1.3(0.9–2.0)                                            |

All estimates are weighted and adjusted for design effects.

a: Adjusted for child's gender.

b: Adjusted for child's gender, mother smoking during pregnancy, length of breastfeeding, introduction to solid foods before 4 months.

c: Adjusted for child's gender, frequency of sport per week, frequency of active playing with a parent per week, frequency of TV watching, frequency of PC use, bedtime, frequency child is taken to the playground.

d: Adjusted for child's gender, fruit portion per day, eating breakfast every day, maternal BMI and sweet drinks consumption.

e: Adjusted for child's gender and all risk factors.

**Table 3** Relative risk ratios (95% confidence interval) of overweight and obesity at age 11 by income quintiles with additional adjustments for risk factors at age 11 (*n* = 9384)

| Multinomial logistic model results |                             |                                                                   |                                                                  |                                                        |                                                         |
|------------------------------------|-----------------------------|-------------------------------------------------------------------|------------------------------------------------------------------|--------------------------------------------------------|---------------------------------------------------------|
|                                    | Baseline model <sup>a</sup> | Model 1: Baseline model + mother's health behaviours <sup>b</sup> | Model 2: baseline model + physical activity markers <sup>c</sup> | Model 3: baseline model + dietary markers <sup>d</sup> | Model 4: baseline model + all risk factors <sup>e</sup> |
| Overweight age 11                  |                             |                                                                   |                                                                  |                                                        |                                                         |
| Top                                | Reference                   | Reference                                                         | Reference                                                        | Reference                                              | Reference                                               |
| Fourth                             | 1.3(1.1–1.5)                | 1.2(1.0–1.5)                                                      | 1.2(1.0–1.5)                                                     | 1.2(1.0–1.4)                                           | 1.2(1.0–1.4)                                            |
| Third                              | 1.5(1.3–1.8)                | 1.5(1.2–1.8)                                                      | 1.4(1.2–1.7)                                                     | 1.4(1.1–1.6)                                           | 1.3(1.1–1.6)                                            |
| Second                             | 1.5(1.2–1.8)                | 1.4(1.2–1.7)                                                      | 1.3(1.1–1.6)                                                     | 1.3(1.1–1.6)                                           | 1.2(1.0–1.4)                                            |
| Bottom                             | 1.4(1.1–1.6)                | 1.3(1.1–1.6)                                                      | 1.2(1.0–1.5)                                                     | 1.1(0.9–1.3)                                           | 1.0(0.8–1.2)                                            |
| Obese age 11                       |                             |                                                                   |                                                                  |                                                        |                                                         |
| Top                                | Reference                   | Reference                                                         | Reference                                                        | Reference                                              | Reference                                               |
| Fourth                             | 1.4(0.9–2.1)                | 1.3(0.9–1.9)                                                      | 1.3(0.9–1.9)                                                     | 1.3(0.8–1.9)                                           | 1.2(0.8–1.7)                                            |
| Third                              | 2.4(1.6–3.6)                | 2.0(1.3–3.1)                                                      | 2.1(1.4–3.1)                                                     | 1.8(1.2–2.8)                                           | 1.5(1.0–2.3)                                            |
| Second                             | 3.4(2.2–5.1)                | 2.7(1.8–4.2)                                                      | 2.6(1.7–4.0)                                                     | 2.6(1.7–3.9)                                           | 1.9(1.2–2.9)                                            |
| Bottom                             | 3.0(2.0–4.5)                | 2.3(1.5–3.6)                                                      | 2.3(1.5–3.5)                                                     | 2.0(1.3–3.1)                                           | 1.4(0.9–2.2)                                            |

All estimates are weighted and adjusted for design effects.

a: Adjusted for child's gender.

b: Adjusted for child's gender, mother smoking during pregnancy, length of breastfeeding, introduction to solid foods before 4 months.

c: Adjusted for child's gender, frequency of sport per week, frequency of active playing with a parent per week, frequency of TV watching, frequency of PC use, bedtime, frequency child is taken to the playground.

d: Adjusted for child's gender, fruit portion per day, eating breakfast every day, maternal BMI and sweet drinks consumption.

e: Adjusted for child's gender and all risk factors.

income quintiles were not statistically significant. For children in the bottom quintile, adjusting for dietary markers did most to attenuate inequalities.

At age 11, we also observed an income gradient in the relative risk of being overweight. Children in the bottom income quintile had 1.4 (95% CI: 1.1–1.6) increased relative risk of being overweight compared to their peers in the highest income quintile. On adjustment for all risk factors in Model 4, the relative risk of overweight for children in the bottom income quintile was fully attenuated.

### *Upward and downward movements across weight categories and which risk factors might explain them*

Table 4 shows that children, who at age 5 were either normal weight or overweight, in the bottom, second and third income quintiles were significantly more likely to experience upward movement across weight categories than children in the top quintile (results for the risk factors are available upon request). Adjustment for physical activity and dietary markers did most to attenuate inequalities. On adjustment for all risk factors, children in the



**Table 4** Average prevalence and odds ratios (95% confidence interval) of upward and downward movements between age 5 and 11 by income quintiles

| Average %                                                        | Multinomial logistic model results |                                                                   |                                                                  |                                                        |                                                         |
|------------------------------------------------------------------|------------------------------------|-------------------------------------------------------------------|------------------------------------------------------------------|--------------------------------------------------------|---------------------------------------------------------|
|                                                                  | Baseline model <sup>a</sup>        | Model 1: Baseline model + mother's health behaviours <sup>b</sup> | Model 2: baseline model + physical activity markers <sup>c</sup> | Model 3: baseline model + dietary markers <sup>d</sup> | Model 4: baseline model + all risk factors <sup>e</sup> |
| Moving up a category between age 5 and 11 ( <i>n</i> = 8852)*    |                                    |                                                                   |                                                                  |                                                        |                                                         |
| Top                                                              | 10.5 ( <i>n</i> = 200)             | Reference                                                         | Reference                                                        | Reference                                              | Reference                                               |
| Fourth                                                           | 12.1 ( <i>n</i> = 242)             | 1.1(0.9–1.4)                                                      | 1.1(0.8–1.4)                                                     | 1.1(0.8–1.4)                                           | 1.0(0.8–1.3)                                            |
| Third                                                            | 16.3 ( <i>n</i> = 313)             | 1.6(1.3–2.0)                                                      | 1.5(1.2–1.9)                                                     | 1.5(1.2–1.8)                                           | 1.3(1.1–1.6)                                            |
| Second                                                           | 19.6 ( <i>n</i> = 336)             | 2.0(1.6–2.5)                                                      | 1.8(1.4–2.3)                                                     | 1.8(1.4–2.2)                                           | 1.5(1.1–1.9)                                            |
| Bottom                                                           | 18.5 ( <i>n</i> = 295)             | 1.9(1.5–2.3)                                                      | 1.6(1.3–2.1)                                                     | 1.5(1.2–2.0)                                           | 1.3(1.0–1.7)                                            |
| Moving down a category between age 5 and 11 ( <i>n</i> = 1852)** |                                    |                                                                   |                                                                  |                                                        |                                                         |
| Top                                                              | 43.7 ( <i>n</i> = 155)             | Reference                                                         | Reference                                                        | Reference                                              | Reference                                               |
| Fourth                                                           | 43.4 ( <i>n</i> = 181)             | 1.0(0.7–1.4)                                                      | 1.0(0.8–1.4)                                                     | 1.1(0.8–1.5)                                           | 1.1(0.8–1.5)                                            |
| Third                                                            | 42.8 ( <i>n</i> = 157)             | 1.0(0.7–1.4)                                                      | 1.0(0.7–1.5)                                                     | 1.0(0.7–1.4)                                           | 1.2(0.8–1.7)                                            |
| Second                                                           | 32.0 ( <i>n</i> = 115)             | 0.6(0.4–0.9)                                                      | 0.7(0.5–1.0)                                                     | 0.7(0.5–1.0)                                           | 0.9(0.6–1.3)                                            |
| Bottom                                                           | 43.5 ( <i>n</i> = 134)             | 1.0(0.7–1.5)                                                      | 1.1(0.7–1.7)                                                     | 1.2(0.8–1.7)                                           | 1.5(1.0–2.3)                                            |

These models were run a sub-sample of children who were at risk of experiencing upward to downward movements across weight categories between age 5 and 11.

\* Children who at age 5 where either normal weight or overweight.

\*\* Children who at age 5 where either obese or overweight. All estimates are weighted and adjusted for design effects.

a: Adjusted for child's gender and puberty.

b: Adjusted for child's gender, puberty, mother smoking during pregnancy, length of breastfeeding, introduction to solid foods before 4 months.

c: Adjusted for child's gender, puberty, frequency of sport per week, frequency of active playing with a parent per week, frequency of TV watching, frequency of PC use, bedtime, frequency child is taken to the playground.

d: Adjusted for child's gender, puberty, fruit portion per day, eating breakfast everyday, maternal BMI and sweet drinks consumption.

e: Adjusted for child's gender, puberty and all risk factors.

lowest income quintile compared to children in the highest income quintile had a reduction in the odds of moving up a weight category of around 55%. Children in the second income quintile were less likely to experience downward movements across weight categories, but the results fail to show a clear income gradient in downward movements across weight categories for children who were either obese or overweight at age 5. Nonetheless, these results are informative because they suggest that similar risk factors were protective against upward movements and promoted downward movements (results available upon request). An earlier bedtime and fruit consumption more than 3 times a day were negatively associated with upward movements and positively associated with downward movements across weight categories. Mother's smoking during pregnancy, introduction to solid foods before 4 months and mother's BMI were positively associated with upward movements and negatively associated with downward movements across weight categories. Adjusting for risk factors measured at age 11 resulted in smoking no longer being statistically significant but the rest of the coefficients remained largely unchanged (results available upon request).

## Discussion

We show, consistent with prior studies,<sup>10</sup> stark income inequalities in the risk of obesity throughout childhood, the emergence of inequalities in the risk of overweight by age 11 and that inequalities became more pronounced between age 5 and 11. After adjustment for risk factors, inequalities between the bottom and top income quintiles were attenuated by at least 50% and were largely no longer statistically significant. Multiple family health behaviours and environmental risk factors were relevant when attempting to explain income inequalities in overweight and obesity amongst children. The results suggest that both markers of physical activity and diet at ages 5 and 11 were particularly relevant in attenuating inequalities throughout childhood. However, maternal health behaviours in early childhood were relevant too as on their own in the model, they attenuated inequalities in child obesity between the bottom and top income quintiles by around 20%. This perhaps

indicates that pathways underpinning inequalities in child adiposity begin early in life and are cumulative over the life course. The influence of each set of risk factors was relatively similar across childhood and some markers were relevant at both ages, such as the mother's BMI, early bedtimes and watching TV less than 1 h per weekday. However, other markers were more relevant at age 5 or 11. For example, skipping breakfast was related to the risk of overweight and obesity, and fruit consumption was related to the risk of overweight at age 5, but these factors played a rather minor role at age 11. In contrast, doing sport more than three times a week played a more important and protective role at age 11 than age 5.

The magnitude of income inequalities in child obesity and overweight grew between ages 5 and 11. Poorer children were more likely to experience upward movements across weight categories than richer ones. These findings suggest that efforts to curb the increasing prevalence of obesity, particularly amongst disadvantaged children, should start early in life. Intervening in the early years when the family environment has more profound influences on children's healthy development has the potential to be particularly effective—setting children onto 'healthy', or at least healthier, adiposity trajectories. Importantly, the results reveal that similar risk factors protected against and promoted, respectively, upward and downward movements across weight categories. This might point to the importance of promoting (e.g. an earlier bedtime, fruit consumption more than 3 times a day) or discouraging (e.g. smoking during pregnancy, early introduction to solid foods and high maternal BMI) these behaviours in an effort to curb further increases in the prevalence of overweight and obesity amongst poorer children.

There are several government initiatives e.g. the Change4life programme,<sup>1</sup> which aim to prevent and address body fat gain amongst children in the UK. Generally, existing policies support healthy living in the family environment by promoting—amongst adults and children—healthy eating (e.g. '5-a-day') and exercise (e.g. '10 000 steps a day'). Our findings support the development of horizontal prevention strategies aimed at tackling a wider set of risk factors from multiple domains including physical, sedentary

and dietary behaviours. However, the evidence on effective policy strategies that reduce or eliminate disparities in children's adiposity is not yet conclusive.<sup>36</sup> Greater efforts are needed to investigate which interventions might contribute to reduce the prevalence of child overweight and obesity. In particular, more research and evaluations are needed to understand which changes in family and children's routines might contribute to a reduction in socioeconomic inequalities in children's adiposity at different ages and their widening across childhood. Based on the findings of this study, interventions focussing on family physical activity and 'healthier diets' could be of benefit, for instance these could include family sport days, distribution of gym passes and cookery classes.

### Strengths and limitations

We used data from the Millennium Cohort Study which provides a large nationally representative sample to investigate inequalities in child obesity and overweight across income quintiles. We were also able to begin exploring the mechanisms behind income disparities in child obesity and overweight but with some limitations. First, our models were unable to fully explain income inequalities in children's adiposity suggesting that other risk factors should be considered in future work. Second, the results did not allow for a conclusion regarding causality between risk factors and income inequalities in overweight and obesity. Third, maternal BMI was included in the analyses in the category 'dietary environment', but it may also reflect genetic as well as shared environment. Given that maternal BMI was the only factor consistently and significantly associated with child overweight and obesity, we ran some sensitivity tests by including the rest of the risk factors related to diet on their own (i.e. without mother's BMI). The results (not shown) reveal that maternal BMI plays a substantial role, yet modelling other dietary factors on their own partially attenuates the unadjusted differences. Fourth, BMI is an imperfect measure of adiposity as it does not distinguish between fat and lean mass.<sup>37</sup> We conducted sensitivity analyses by categorizing children as overweight and obese using body fat at age 11 (not measured at age 5). The results (available on request) were largely consistent with those obtained using BMI. Fifth, health behaviours were reported by the mother. Parental reports might be more suitable for younger children, but parents are frequently unaware of the behaviours of 11-year-olds who spend considerable time beyond purview. Sixth, it could be that children who experienced upward movements across weight categories between age 5 and 11 were already on the cusp of their weight categories in the previous period and differed from children who were on the lower end of healthy weight/overweight at age 5. To assess whether this could be the case, in additional analyses (not shown), we compare average BMI at age 5 of children who experienced/did not experience upward movements across weight categories. Results reveal that although children who experienced upward movements had higher BMI levels at age 5, differences between the two groups were not large (approximately 0.2 SD of BMI) suggesting that those who moved up a weight category were not necessarily on the cusp of their weight category at age 5. Finally, as in any longitudinal study, missing data because of loss to follow-up could bias the results. In order to account for this, we used non-response weights but we may not have been able to fully adjust for sample attrition.

### Future work

As the processes involved in the development of fat gain in children involve social, environmental and biological factors, future work should be directed at more closely examining different typologies of risk factors and their interaction. More work is needed to establish whether there would be a reduction in inequalities and in the widening of the inequality gap across childhood if poorer families and their children adopted healthier behaviours.

## Acknowledgements

We would like to thank the Millennium Cohort Study families for their time and cooperation, as well as the Millennium Cohort Study team at the Institute of Education. The Millennium Cohort Study is funded by the ESRC.

## Funding

This work has been supported by the UK Economic and Social Research Council's International Centre for Life Course Studies in Society and Health, ref: ES/J019119/1.

*Conflicts of interest:* None declared.

## Key points

- The results reveal stark income inequalities in child obesity/overweight
- Income inequalities in child overweight/obesity widened across childhood
- Multiple risk factors to do with physical activity and diet were particularly important in explaining income inequalities and their widening across childhood
- The results support the need of early interventions which take account of multiple risk factors

## References

- 1 National Obesity Forum. State of the nation's waistline—Obesity in the UK: analysis and expectations. 2014.
- 2 Reilly JJ, Dorosty AR. Epidemic of obesity in UK children. *Lancet*. 1999;354:1874–5.
- 3 Jotangia D, Moody A, Stamatakis E, Wardle H. *Obesity Among Children Under 11*. London: Department of Health, 2005.
- 4 Reilly JJ, Methven E, McDowell ZC, et al. Health consequences of obesity. *Arch. Dis. Childhood*. 2003;88:748–52.
- 5 Dietz WH. Health consequences of obesity in youth: childhood predictors of adult disease. *Pediatrics* 1998;101:518–25.
- 6 Guo SS, Chumlea WC. Tracking of body mass index in children in relation to overweight in adulthood. *Am J Clin Nutr* 1999;70:145s–8s.
- 7 Kelsey MM, Zaepfel A, Bjornstad P, Nadeau KJ. Age-related consequences of childhood obesity. *Gerontology*. 2013;60:222–8.
- 8 Must A, Strauss RS. Risks and consequences of childhood and adolescent obesity. *Int J Obes* 1999;23:S2–11.
- 9 Griffith LJ, Hawkins SS, Cole T, et al. Childhood overweight and obesity. In: Hansen K, Joshi H, Dex S, editors. *Children of the 21st Century. The UK Millennium Cohort Study Series 2*. Bristol: The Policy Press, 2010.
- 10 El-Sayed AM, Scarborough P, Galea S. Socioeconomic inequalities in childhood obesity in the United Kingdom: a systematic review of the literature. *Obes Facts*. 2012;5:671–92.
- 11 Stamatakis E, Wardle J, Cole TJ. Childhood obesity and overweight prevalence trends in England: evidence for growing socioeconomic disparities. *Int J Obes*. 2010;34:41–7.
- 12 Costa-Font J, Gil J. Intergenerational and socioeconomic gradients of child obesity. *Soc Sci Med*. 2013;93:29–37.
- 13 Kinra S, Nelder RP, Lewendon GJ. Deprivation and childhood obesity: a cross sectional study of 20 973 children in Plymouth, United Kingdom. *J Epidemiol Commun Health*. 2000;54:456–60.
- 14 Howe LD, Tilling K, Galobardes B, et al. Socioeconomic disparities in trajectories of adiposity across childhood. *Int J Pediatr Obes*. 2011;6:e144–e53.
- 15 Bouthoorn SH, Wijtzes AI, Jaddoe VWV, et al. Development of socioeconomic inequalities in obesity among Dutch pre-school and school-aged children. *Obesity*. 2014;22:2230–7.

- 16 Singh GK, Kogan MD, Van Dyck PC, Siahpush M. Racial/ethnic, socioeconomic, and behavioral determinants of childhood and adolescent obesity in the United States: analyzing independent and joint associations. *Ann Epidemiol*. 2008;18:682–95.
- 17 Dennison BA, Erb TA, Jenkins PL. Television viewing and television in bedroom associated with overweight risk among low-income preschool children. *Pediatrics*. 2002;109:1028–35.
- 18 Reilly JJ, Armstrong J, Dorosty AR, et al. Early life risk factors for obesity in childhood: cohort study. *BMJ*. 2005;330:1357.
- 19 Shrewsbury V, Wardle J. Socioeconomic Status and adiposity in childhood: a systematic review of cross-sectional studies 1990–2005. *Obesity*. 2008;16:275–84.
- 20 Hansen K. *Millennium Cohort Study First, Second and Third Surveys: A Guide to the Datasets*. London: Centre for Longitudinal Studies, Institute of Education, University of London, 2008.
- 21 Cole TJ, Bellizzi MC, Flegal KM, Dietz WH. Establishing a standard definition for child overweight and obesity worldwide: international survey. *BMJ*. 2000;320:1240.
- 22 Hawkins SS, Cole TJ, Law C. Maternal employment and early childhood overweight: findings from the UK Millennium Cohort Study. *Int J Obes*. 2007;32:30–8.
- 23 OECD. OECD Framework for Statistics on the Distribution of Household Income, Consumption and Wealth. 2013.
- 24 Hawkins SS, Cole TJ, Law C, Group atMCSCH. An ecological systems approach to examining risk factors for early childhood overweight: findings from the UK Millennium Cohort Study. *J Epidemiol Commun Health*. 2009;63:147–55.
- 25 Griffiths L, Hawkins S, Cole T, Dezauteux C. Risk factors for rapid weight gain in preschool children: findings from a UK-wide prospective study. *Int J Obes*. 2010;34:624–32.
- 26 Arenz S, Rückerl R, Koletzko B, von Kries R. Breast-feeding and childhood obesity—a systematic review. *Int J Obes*. 2004;28:1247–56.
- 27 Harder T, Bergmann R, Kallischnigg G, Plagemann A. Duration of breastfeeding and risk of overweight: a meta-analysis. *Am J Epidemiol*. 2005;162:397–403.
- 28 Brophy S, Cooksey R, Gravenor MB, et al. Risk factors for childhood obesity at age 5: analysis of the Millennium Cohort Study. *BMC Public Health*. 2009;9:467.
- 29 Connelly JB, Duaso MJ, Butler G. A systematic review of controlled trials of interventions to prevent childhood obesity and overweight: a realistic synthesis of the evidence. *Public Health*. 2007;121:510–7.
- 30 Vandewater EA, Shim M-s, Caplovitz AG. Linking obesity and activity level with children's television and video game use. *J Adolesc*. 2004;27:71–85.
- 31 Krebs NF, Himes JH, Jacobson D, et al. Assessment of Child and Adolescent Overweight and Obesity. *Pediatrics*. 2007;120:S193–228.
- 32 Ng SW, Ni Mhurchu C, Jebb SA, Popkin BM. Patterns and trends of beverage consumption among children and adults in Great Britain, 1986–2009. *Br J Nutr*. 2012;108:536–51.
- 33 Kelly Y, Bartley M. Parental and child health. In: Hansen K, Joshi H, Dex S, editors. *Children of the 21st Century*. Bristol, UK: The Policy Press, 2010.
- 34 Marshall WA, Tanner JM. Variations in the pattern of pubertal changes in boys. *Arch Dis Childhood*. 1970;45:13–23.
- 35 Marshall WA, Tanner JM. Variations in pattern of pubertal changes in girls. *Arch Dis Childhood*. 1969;44:291.
- 36 Kipping RR, Howe LD, Jago R, et al. Effect of intervention aimed at increasing physical activity, reducing sedentary behaviour, and increasing fruit and vegetable consumption in children: active for Life Year 5 (AFLY5) school based cluster randomised controlled trial. *BMJ*. 2014;348.
- 37 Daniels SR. The use of BMI in the clinical setting. *Pediatrics*. 2009;124:S35–41.

.....  
*European Journal of Public Health*, Vol. 26, No. 1, 13–18

© The Author 2015. Published by Oxford University Press on behalf of the European Public Health Association. All rights reserved.  
doi:10.1093/eurpub/ckv213 Advance Access published on 24 November 2015  
.....

## Television watching and risk of childhood obesity: a meta-analysis

Gang Zhang<sup>1,\*</sup>, Lei Wu<sup>2,\*</sup>, Lingling Zhou<sup>3,\*</sup>, Weifeng Lu<sup>4</sup>, Chunting Mao<sup>5</sup>

1 Department of Newborn Infants, Nanjing Children's Hospital of Nanjing Medical University, Nanjing, China

2 Department of laboratory Medicine, The First affiliated Hospital of Nanjing Medical University, Nanjing, China

3 Department of Orthopaedic, Nanjing Children's Hospital of Nanjing Medical University, Nanjing, China

4 Surgical Intensive Care Unite, Nanjing Children's Hospital of Nanjing Medical University, Nanjing, China

5 Department of Child health care, Nanjing Children's Hospital of Nanjing Medical University, Nanjing, China

**Correspondence:** Weifeng Lu, Surgical Intensive Care Unite, Nanjing Children's Hospital of Nanjing Medical University, 72 Guangzhou Road, Gulou district, Nanjing 210008, China, e-mail: njweifeng\_lu@163.com or Chunting Mao, Department of Child health care, Nanjing Children's Hospital of Nanjing Medical University, 72 Guangzhou Road, Gulou district, Nanjing 210008, China, Tel: +86 25 83117394, e-mail: chunting\_mao@163.com

\*These authors contributed equally to this work.

**Background:** Over the last few decades, there has been a worldwide epidemic of childhood obesity. An important step in successful prevention in paediatrics is the identification of modifiable risk factors of childhood obesity. Many studies have evaluated the associations between television (TV) watching and childhood obesity but yielded inconsistent results. **Methods:** To help elucidate the role of TV watching, PubMed and Embase databases were searched for published studies on associations between TV watching and childhood obesity. Random-effects models and dose–response meta-analyses were used to pool study results. **Results:** Fourteen cross-sectional studies with 24 reports containing 106 169 subjects were included in the meta-analysis. Subgroup analyses were conducted by the available characteristics of studies and participants. The multivariable-adjusted overall OR of the childhood obesity for the highest vs. the lowest time of TV watching was 1.47 [95% confidence interval (95% CI): 1.33–1.62]. A linear dose–response relationship was also found for TV watching and childhood obesity ( $P < 0.001$ ), and the risk increased by 13% for each 1 h/day increment in TV watching. Subgroup analysis showed a basically consistent result with the overall analysis. The association is observed in both boys and girls (for boys, OR 1.30, 95% CI 1.16–1.45; for girls, OR 1.26, 95% CI 1.11–1.41). **Conclusions:** our meta-analysis suggested that increased TV watching is associated with increased risk of childhood obesity. And restricting TV time and other sedentary behaviour of children may be an important public health strategy to prevent childhood obesity.

.....
